# Supplementary material for: Influence of the shared epitope on the elicitation of experimental autoimmune arthritis biomarkers
Source: PubMed Central journal article supplement (PMC8049293; doi:10.1371/journal.pone.0250177), 2021-04-15

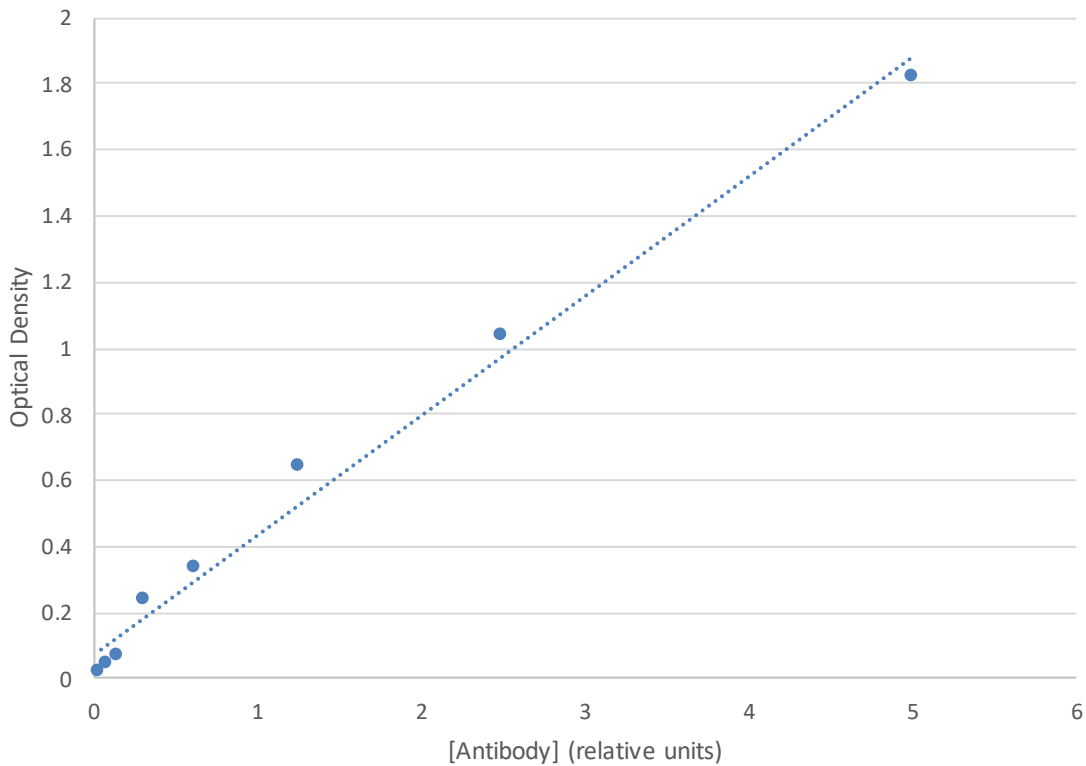

Supplement: pone.0250177.s001.pdf [file pone.0250177.s001.pdf]
